# Supplementary material
Source: publisher figshare collection journal article supplement (https://gsapubs.figshare.com/ndownloader/files/22409313)
Supplement: Supplementary file 1 [file 22409313]

## Sheet: MD Piedmont DZ standard summary
Martin, A.J., Southworth, S., Collins, J.C., Fisher, S.W., and Kingman, E.R., III, 2015, Laurentian and Amazonian sediment sources to Neoproterozoic–lower Paleozoic Maryland Piedmont rocks: Geosphere, v. 15, doi:10.1130/GES01140.1.
SUPPLEMENTAL TABLE 2. Standard zircon analyses summary
		Year	Number of	1 standard deviation	1 standard deviation
Sample	Formation	analyzed†	standard analyses	206Pb*/207Pb* (%)	206Pb*/238U (%)
Western group (Westminster terrane and Sugarloaf Mountain anticlinorium)
908004	Ijamsville	2009	36	0.74	2
908002	Urbana	2009	44	0.68	1.1
908001	Sugarloaf	2009	41	0.74	1.9
1010001	Sams Creek-N	2011	49	0.47	1.4
908003	Sams Creek-S	2009	52	0.67	1.4
Setters Formation
809002	Setters-W	2010	50	0.38	1.2
909007	Setters-E	2010	49	0.59	2.1
Potomac terrane
910004	Marburg-NW	2011	51	0.5	1.6
910005	Marburg-NE	2011	60	0.43	1.1
909005	Marburg-S	2010	50	0.32	1.6
910002	Prettyboy	2011	48	0.45	1.9
810001	Blockhouse Point	2009	45	0.56	1.9
310001	Bear Island-VA	2010	53	0.3	0.72
1010002	Mather Gorge-N	2011	61	0.37	1.3
909003	Sykesville-S	2010	66	0.65	2.1
909001	Sykesville-N	2010	49	0.39	1.3
909004	Northwest Branch	2010	50	0.41	1.2
808003	Laurel	2009	48	0.49	1.2
†Samples analyzed in 2009 using Isoprobe; in 2010 and 2011 using NU Plasma.
Pb* refers to radiogenic lead.
